1 Prevalence and Determinants of Prehospital Impression of Stroke in Ischemic Stroke Patients

2

3 Mauro Caffarelli MD <sup>1,2</sup>, Andrew J. Wood MPH <sup>2</sup>, Remle P Crowe, PhD <sup>3</sup>, Edilberto Amorim

4 MD,<sup>2</sup> Hooman Kamel MD,<sup>4</sup> Anthony S. Kim MD MAS <sup>2</sup>, Elan L. Guterman MD MAS <sup>2,5</sup>.

5 <sup>1</sup> Department of Pediatrics, University of California, San Francisco. San Francisco, CA

6 <sup>2</sup> Department of Neurology, UCSF Weill Institute for Neurosciences, University of California,

7 San Francisco. San Francisco, CA

8 <sup>3</sup> ESO, Inc., Austin, Tx

9 <sup>4</sup> Department of Neurology, Weill Cornell Medicine, New York, NY

10 <sup>5</sup> UCSF Philip R. Lee Institute for Health Policy Studies, University of California, San Francisco.

11 San Francisco, CA

12

13 Corresponding Author: Mauro Caffarelli, MD

14 [Mauro.caffarelli@ucsf.edu](mailto:Mauro.caffarelli@ucsf.edu)

15 550 16<sup>th</sup> Street, 4<sup>th</sup> Floor, Box 0110, San Francisco, CA 94143

16

17 Word Count: 1993 body; 3782 document

18

## 19 ABBREVIATIONS

|     |                            |
|-----|----------------------------|
| CI  | Confidence Interval        |
| EHR | Electronic Health Record   |
| EMS | Emergency Medical Services |
| ED  | Emergency Department       |
| GCS | Glasgow Coma Scale         |
| HDE | Health Data Exchange       |
| RR  | Relative Risk              |
| SVI | Social Vulnerability Index |

20

21

22 ABSTRACT: 265 words

23 BACKGROUND: Emergency Medical Services (EMS) clinicians are front-line in evaluating  
24 patients with stroke in the community. Their ability to correctly identify stroke influences  
25 downstream management decisions. We sought to use a large national database of prehospital  
26 clinical data to determine risk factors associated with missed EMS stroke identification.

27 METHODS: Retrospective study examining EMS evaluation of adults with Emergency  
28 Department (ED) stroke diagnosis. We leveraged the ESO Data Collaborative research dataset  
29 containing EHR data from 2019-2022 that has a subset of encounters with linked hospital  
30 diagnostic codes. Our primary outcome was the presence of an EMS diagnosis of stroke. We  
31 evaluated the association between demographic and clinical variables with EMS stroke  
32 identification using Pearson  $\chi^2$  test for demographic variables and multivariable GLM for  
33 clinical variables with adjustment for demographic variables.

34 RESULTS: We identified 34,504 EMS encounters for patients with ED stroke diagnosis. Of  
35 these, 11,077 (32.1%) strokes had missed EMS stroke identification and instead had an EMS  
36 impression of “Generalized Weakness” (25.9%), “Altered Level of Consciousness” (24.9%), and  
37 “Dizziness” (7.2%). Patients more likely to have missed prehospital stroke identification were of  
38 Black race (p=0.0001) and Hispanic ethnicity (p=0.0001). Clinical variables associated with  
39 higher risk of missed EMS stroke identification were suspected alcohol or drug use (RR 1.48,  
40 95% CI 1.37-1.59), low GCS (RR 1.17, 95% CI 1.10-1.24), tachycardia (RR 1.05, 95% CI 1.01-  
41 1.09), and hypotension (RR 1.47, 95% CI 1.34-1.61).

42

43 CONCLUSIONS: Approximately 1-in-3 patients transported by EMS did not have their stroke

- 44 identified in the prehospital setting. Factors associated with lower odds of missed EMS stroke
- 45 identification provide a starting point for future performance improvement initiatives.

46 **Background.**

47 Emergency medical services (EMS) provide care for over 250,000 patients hospitalized with  
48 stroke in the US annually. Prehospital stroke recognition and pre-arrival alerting are linked with  
49 improved rates of time-sensitive treatment with thrombolysis and thrombectomy.<sup>1-4</sup> Conversely,  
50 lack of EMS stroke recognition may result in transport to a facility not equipped to treat patients  
51 with stroke and may result in delays in care.

52 Prior single-center studies estimate that 30% of strokes are not identified during EMS  
53 evaluation.<sup>3,5</sup> However, these studies were conducted before thrombectomy was established as  
54 the standard of care for patients with stroke due to a large vessel occlusion. Work has been done  
55 to improve EMS training on stroke recognition and the use of prehospital stroke screening  
56 scales,<sup>6</sup> but whether these efforts have improved rates of EMS stroke identification is unclear.<sup>7,8</sup>

57 Moreover, the clinical and social factors associated with an increased risk of missed  
58 stroke diagnosis during EMS evaluation are unknown, despite prior studies showing associated  
59 delayed treatment and worse outcomes in people from historically underserved or marginalized  
60 backgrounds.<sup>9-11</sup> Prior studies are largely limited to patients presenting to urban academic  
61 hospitals with findings that may not be generalizable to non-academic or rural hospitals. This  
62 study aimed to quantify the proportion of EMS transported patients who were diagnosed with  
63 strokes that were not identified during prehospital evaluation. Secondarily we aimed to identify  
64 the clinical and sociodemographic factors associated with missed prehospital stroke  
65 identification using a geographically broad national dataset of linked EMS and hospital records.

66

67 **Methods.**

68 Study Design and Setting:

69           We conducted a retrospective analysis of adults who were transported by EMS after a  
70 911 activation and were subsequently diagnosed with stroke during the emergency department  
71 (ED) evaluation. We used the ESO Data Collaborative public-use research dataset. ESO is a  
72 leading provider of pre-hospital Electronic Health Record (EHR) systems for EMS clinical  
73 documentation in the US.<sup>12</sup> ESO EHR collects data in accordance with the National EMS  
74 Information System. Data elements in the prehospital EHR include information related to EMS  
75 dispatch and the prehospital clinical encounter. EMS clinicians document encounters using  
76 prespecified data fields, which include diagnostic impressions and whether a ‘stroke treatment  
77 protocol’ was used. The ESO Data Collaborative consists of all records from agencies who have  
78 agreed to share their de-identified EHR data for the purposes of research. Annually, a de-  
79 identified dataset is constructed with all records from participating agencies. This dataset  
80 includes EMS responses in every region of the country. A subset of destination facilities (i.e.  
81 hospitals) participate in the ESO Health Data Exchange (HDE) which allows prehospital data to  
82 be directly linked with hospital EHR data using HL7 messaging including ICD-10 diagnosis  
83 codes and discharge dispositions. This study was approved by the institutional review board of  
84 the University of California, San Francisco.

85

#### 86 Study Population:

87 We identified adult patients aged 18 years or older who were transported to a hospital following  
88 a 9-1-1 EMS response, and were diagnosed with an acute ischemic stroke in the ED between  
89 January 1, 2019 and December 31, 2022. A diagnosis of acute ischemic stroke in the ED was  
90 defined as having an ICD-10 primary discharge diagnosis code of cerebral infarction (I63.x).

91

92

93 Outcome:

94 The primary outcome was missed EMS stroke identification. Missed EMS stroke identification  
95 was defined as no recorded diagnostic impression of stroke during EMS evaluation and no  
96 indication of stroke protocol use.

97 This definition assumes that the EMS diagnostic impression is an accurate reflection of  
98 whether or not an EMS clinician suspects a patient is experiencing a stroke. To determine  
99 whether this was a reasonable assumption, we examined the narrative history recorded by the  
100 EMS clinician from a random sample of 300 encounters in the cohort and found that a minority  
101 of patients were misclassified using this definition (Appendix; Supplemental Tables 1 & 2).

102

103 Measurements:

104 Demographics, diagnostic impressions, clinical information (e.g. vital signs and Glasgow  
105 Coma Scale [GCS]), and the EMS agency treatment protocol associated with each encounter are  
106 entered into the prehospital EHR by EMS clinicians as part of the required documentation  
107 following a 911 call. We evaluated patient age, sex, race, ethnicity, Census region, urbanicity of  
108 the community where the encounter took place, the first recorded prehospital vital sign  
109 measurements, GCS, and whether the EMS clinician suspected alcohol or substance use. Age  
110 was divided into ordinal groups of <40, 40–59, 60–79, and >80 years. Race was recorded by the  
111 EMS clinicians and categorized as White, Black or African American, Asian or Pacific islander,  
112 or Other/unknown. Ethnicity was categorized as Hispanic or non-Hispanic; these were collected  
113 because of previously-reported disparities in stroke care for Hispanic patients.<sup>9,11</sup> Social  
114 vulnerability index (SVI) – a measure of socioeconomic factors associated with adverse

115 community-level hazards and stressors – was categorized into four quartiles from least to most  
116 vulnerable. Urbanicity was determined by Rural-Urban Commuting Area Codes and categorized  
117 as: Metropolitan (population > 49,999) or Non-metropolitan (population < 50,000). Census  
118 regions were categorized as Northeast, South, Midwest; or West. GCS and vital sign  
119 measurements were divided into ordinal groups in alignment with conventionally accepted  
120 normal and abnormal ranges for adults to ease the interpretation of effect estimates.

121

122 Statistical Analysis:

123 We calculated the proportion of patients with ED-diagnosed stroke where there was missed EMS  
124 identification of stroke during prehospital evaluation. We identified sociodemographic and  
125 clinical characteristics associated with missed EMS stroke identification using Pearson  $\chi^2$  test  
126 for the unadjusted analyses and binomial family and log link generalized linear models for the  
127 adjusted analyses. The models allowed us to examine the association of initial vital sign  
128 measurements, level of consciousness, and suspected alcohol or drug use, with the risk of missed  
129 EMS stroke identification. We calculated unadjusted and adjusted estimates separately for each  
130 exposure, adding patient age, sex, race, GCS, and urbanicity in the adjusted analyses.

131 Because ED encounters in rural areas are not well represented in existing literature, we  
132 sought to determine whether urbanicity modifies the likelihood and risk factors of having missed  
133 EMS stroke identification. To do this, we repeated the models after stratifying by whether the  
134 encounter originated in an urban or rural environment. All reported risk ratios (RRs) are from  
135 adjusted models unless otherwise specified. Statistical analyses were performed using Stata  
136 (version 15.1, StataCorp, College Station, TX).

137



138

## Results

139 We analyzed 34,504 EMS encounters for patients that were diagnosed with stroke in the  
140 ED. Most (94.7%) encounters that occurred in a metropolitan area. Approximately half were  
141 female (51.3%). Two thirds (64.3%) of patients were White, and 16.9% were Black and 8.1%  
142 had documentation of Hispanic ethnicity.

143 There were 11,077 (32.1%) encounters which did not have a prehospital diagnostic  
144 impression of stroke by EMS evaluation. The most common EMS diagnostic impressions for  
145 those without stroke recognition were “Generalized Weakness” (25.9%), “Altered Level of  
146 Consciousness” (24.9%), “Dizziness” (7.2%), “Other Cardiovascular” (5.7%), and “Pain” (3.7%)  
147 (Table 1).

148 A larger proportion of Black patients had missed EMS stroke identification compared to  
149 White patients (34.9% vs 31.4%,  $p < 0.001$ ). Similarly, a larger proportion of Hispanic patients  
150 had missed EMS stroke identification compared to non-Hispanic patients (36.5% vs 31.7%,  
151  $p < 0.001$ ). A larger proportion of patients with high SVI had missed EMS stroke identification  
152 compared to patients with low SVI (28.2% vs 21.4%,  $p < 0.001$ ) Stroke patients with missed EMS  
153 stroke identification during EMS evaluation were otherwise similar with respect to age, sex, and  
154 urbanicity. (Table 2).

155

### 156 **Clinical Risk Factors for Missed Prehospital Stroke Identification:**

157 Suspected alcohol or drug use, GCS score, and vital sign abnormalities were associated with risk  
158 of missed EMS stroke identification. Suspected alcohol or drug use was associated with a 48%  
159 increased risk of missed EMS stroke identification (RR 1.48, 95% CI, [1.37 to 1.59]). Severe  
160 depression in consciousness (GCS 3-8) was associated with a 17% increased risk of missed EMS

161 stroke identification (RR 1.17, [1.10 - 1.24]). Tachycardia (RR 1.05, [1.01 – 1.09]), hypotension  
162 (RR 1.22, [1.15 – 1.30]), and bradypnea (RR 1.44, [1.19 – 1.74]) were also associated with an  
163 increased risk of missed EMS stroke identification (Table 3).

164 After stratifying the main analysis by whether the encounter occurred in a metropolitan  
165 area, suspected alcohol or drug use, GCS, and vital sign abnormalities remained associated with  
166 an increased risk of missed EMS stroke identification in both settings (Supplemental Table 3).

167

## 168 Discussion

169 This is the largest cohort study of the EMS stroke diagnostic sensitivity in the United  
170 States; we found that nearly one-third of strokes were missed during EMS evaluation. Our  
171 findings are consistent with estimates obtained before mechanical thrombectomy was established  
172 as standard therapy for large vessel occlusive stroke.<sup>13,14</sup> This suggests that the rates of missed  
173 EMS stroke identification remain largely unchanged despite efforts to improve stroke  
174 recognition in the prehospital setting.

175 Black and Hispanic patients had a significantly higher risk of missed EMS stroke  
176 identification. Prehospital notification is already shown to be less likely to be used for Black and  
177 Hispanic patients with stroke.<sup>3,5</sup> Our findings suggest that the failure to recognize stroke in the  
178 field may contribute to reduced rates of hospital pre-arrival stroke notification in Black and  
179 Hispanic patients. We additionally found that a report of alcohol or substance use increased the  
180 risk of missed EMS stroke identification. This novel finding suggests that alcohol use may  
181 distract clinicians from developing a suspicion of stroke.

182 This is the first study to examine prehospital clinical characteristics that modulate the risk  
183 of missed EMS stroke identification: we found that prehospital hypotension, tachycardia, and

184 loss of consciousness were associated with an increased risk of missed EMS stroke  
185 identification. This may be related to incorrect clinical assumptions that hypotension and  
186 tachycardia are reflective of a separate pathophysiological process – such as sepsis – that  
187 misleads the clinician away from a stroke diagnosis.<sup>15,16</sup> Patients with a low GCS (3-8) also was  
188 associated with a higher risk of missed EMS stroke identification compared to patients with near  
189 normal GCS. The inability to obtain a nuanced neurological assessment in nearly comatose  
190 patients likely obscures ascertainment of stroke. While it is unlikely these patients are managed  
191 with any less urgency than patients who have stroke recognized by EMS, it is possible that  
192 patient triage and hospital destination decisions differ between the two groups. Further research  
193 is needed to compare management between patients where the stroke was recognized versus  
194 missed in those who present with disorders of consciousness.

195 We found that *half* of patients who had missed EMS stroke identification were given a  
196 diagnostic impression of generalized weakness or altered level of consciousness. Attempts to  
197 improve rates of EMS stroke identification and hospital prenotification have focused on  
198 educational interventions targeted to EMS clinicians evaluating patients already suspected to  
199 have a stroke.<sup>7,8</sup> While shown to be useful in rates of EMS stroke identification, the benefit of  
200 one brief educational module was not sustained after 3 months;<sup>17</sup> a separate enhanced paramedic  
201 stroke assessment method in patients with suspected stroke actually lengthened the time of  
202 prehospital care episodes and delayed thrombolysis.<sup>18</sup> Our finding suggests that educational  
203 efforts should focus on expanding the use of prehospital neurological assessments to all patients  
204 who present with weakness and altered level of consciousness.

205 Limitations to this study include the reliance on an EMS diagnostic impressions of stroke  
206 and protocols used as a proxy for when EMS clinicians suspected stroke. This study did not

207 examine how EMS stroke identification influences downstream management – such as hospital  
208 pre-arrival notification by EMS, hospital destination decisions, and in-hospital stroke care.  
209 Finally, this study demonstrates but does not explain racial and ethnic disparities in EMS stroke  
210 identification, and whether this is reflective of individual bias occurring on the part of the EMS  
211 clinician or structural factors that drive disparate health characteristics in racialized populations  
212 at-large.

213 Our findings highlight that a large proportion of patients with stroke do not have the  
214 stroke identified by EMS. Patients who identify as Black and Hispanic are disproportionately  
215 affected, and poor mental status and vital sign abnormalities not traditionally associated with  
216 stroke are also associated with an increased risk of missed EMS stroke identification.

217 Educational interventions to improve EMS stroke identification can focus on maintaining a  
218 suspicion of stroke in diverse clinical contexts to improve stroke identification.

219

220

221 Sources of Funding:

222 Dr. Caffarelli receives research support from the UCSF Department of Pediatrics, UCSF Clinical  
223 and Translational Science Institute, Hellman Society, and Pediatric Epilepsy Research  
224 Foundation.

225 Andrew Wood is supported by the National Institute on Aging (5R01AG074710) and the  
226 National Institute of Neurological Disorders and Stroke (K23NS116128).

227 Dr. Amorim is a principal investigator in several active grants supported by the NIH  
228 (1K23NS119794), the Department of Defense (EP220036), American Heart Association  
229 (20CDA35310297 and Harold Amos Medical Faculty Development Award), Cures Within  
230 Reach, and the Zoll Foundation.

231 Dr. Kim receives funding from NIH/NINDS, NIH/NCATS, NIH/NIMHD, and AHA.

232 Dr. Guterman receives funding from the National Institute of Neurological Disorders and Stroke  
233 (K23NS116128), National Institute on Aging (5R01AG056715), and American Academy of  
234 Neurology.

235

236

237 Disclosures

238 Dr. Caffarelli is named as sole inventor on a patent on the use of electroencephalography for  
239 stroke diagnosis with no associated licensing agreements.

240 Dr. Kamel has a PI role in the ARCADIA trial, which received in-kind study drug from the

241 BMS-Pfizer Alliance for Eliquis and ancillary study support from Roche Diagnostics; a

242 Deputy Editor role for *JAMA Neurology*; clinical trial steering/executive committee roles for

243 the STROKE-AF (Medtronic), LIBREXIA-AF (Janssen), and LAAOS-4 (Boston Scientific)

244 trials; consulting or endpoint adjudication committee roles for AbbVie, AstraZeneca,  
245 ArthroSi Therapeutics, Boehringer Ingelheim, Eli Lilly, and Novo Nordisk; and household  
246 ownership interests in TETMedical, Spectrum Plastics Group, and Ascential Technologies.

247 Dr. Kim is an Associate Editor of NEJM and Journal Watch: Neurology

248 Dr. Guterman receives personal compensation from JAMA Neurology and stock from REMO

249 Health, which are unrelated to the submitted work.

250

251

252

253

- 254 1. McKinney JS, Mylavarapu K, Lane J, Roberts V, Ohman-Strickland P, Merlin MA. Hospital  
255 Prenotification of Stroke Patients by Emergency Medical Services Improves Stroke Time  
256 Targets. *Journal of Stroke and Cerebrovascular Diseases*. 2013;22(2):113-118.  
257 doi:10.1016/j.jstrokecerebrovasdis.2011.06.018
- 258 2. Oostema JA, Nasiri M, Chassee T, Reeves MJ. The Quality of Prehospital Ischemic Stroke  
259 Care: Compliance with Guidelines and Impact on In-hospital Stroke Response. *Journal of*  
260 *Stroke and Cerebrovascular Diseases*. 2014;23(10):2773-2779.  
261 doi:10.1016/j.jstrokecerebrovasdis.2014.06.030
- 262 3. Lin CB, Peterson ED, Smith EE, et al. Emergency Medical Service Hospital Prenotification  
263 Is Associated With Improved Evaluation and Treatment of Acute Ischemic Stroke. *Circ:*  
264 *Cardiovascular Quality and Outcomes*. 2012;5(4):514-522.  
265 doi:10.1161/CIRCOUTCOMES.112.965210
- 266 4. Nielsen VM, Song G, DeJoie-Stanton C, Zachrison KS. Emergency Medical Services  
267 Prenotification is Associated with Reduced Odds of In-Hospital Mortality in Stroke Patients.  
268 *Prehospital Emergency Care*. 2023;27(5):639-645. doi:10.1080/10903127.2022.2079784
- 269 5. Govindarajan P, Friedman BT, Delgadillo JQ, et al. Race and Sex Disparities in Prehospital  
270 Recognition of Acute Stroke. Callaway C, ed. *Acad Emerg Med*. 2015;22(3):264-272.  
271 doi:10.1111/acem.12595
- 272 6. Crocco TJ, Grotta JC, Jauch EC, et al. EMS Management of Acute Stroke—Prehospital  
273 Triage (Resource Document to NAEMSP Position Statement). *Prehospital Emergency Care*.  
274 2007;11(3):313-317. doi:10.1080/10903120701347844
- 275 7. Kidwell CS, Starkman S, Eckstein M, Weems K, Saver JL. Identifying Stroke in the Field:  
276 Prospective Validation of the Los Angeles Prehospital Stroke Screen (LAPSS). *Stroke*.  
277 2000;31(1):71-76. doi:10.1161/01.STR.31.1.71
- 278 8. Bray JE, Martin J, Cooper G, Barger B, Bernard S, Bladin C. An Interventional Study to  
279 Improve Paramedic Diagnosis of Stroke. *Prehospital Emergency Care*. 2005;9(3):297-302.  
280 doi:10.1080/10903120590962382
- 281 9. Levine DA, Duncan PW, Nguyen-Huynh MN, Ogedegbe OG. Interventions Targeting  
282 Racial/Ethnic Disparities in Stroke Prevention and Treatment. *Stroke*. 2020;51(11):3425-  
283 3432. doi:10.1161/STROKEAHA.120.030427
- 284 10. Hsia AW, Edwards DF, Morgenstern LB, et al. Racial Disparities in Tissue Plasminogen  
285 Activator Treatment Rate for Stroke: A Population-Based Study. *Stroke*. 2011;42(8):2217-  
286 2221. doi:10.1161/STROKEAHA.111.613828
- 287 11. Rinaldo L, Rabinstein AA, Cloft H, Knudsen JM, Castilla LR, Brinjikji W. Racial and Ethnic  
288 Disparities in the Utilization of Thrombectomy for Acute Stroke: Analysis of Data From  
289 2016 to 2018. *Stroke*. 2019;50(9):2428-2432. doi:10.1161/STROKEAHA.118.024651
- 290 12. ESO - EMS Homepage. Accessed September 28, 2022. <https://www.eso.com/ems/>

- 291 13. Albers GW, Marks MP, Kemp S, et al. Thrombectomy for Stroke at 6 to 16 Hours with  
292 Selection by Perfusion Imaging. *N Engl J Med*. 2018;378(8):708-718.  
293 doi:10.1056/NEJMoa1713973
- 294 14. Nogueira RG, Jadhav AP, Haussen DC, et al. Thrombectomy 6 to 24 Hours after Stroke with  
295 a Mismatch between Deficit and Infarct. *N Engl J Med*. 2018;378(1):11-21.  
296 doi:10.1056/NEJMoa1706442
- 297 15. Levy MM, Fink MP, Marshall JC, et al. 2001 SCCM/ESICM/ACCP/ATS/SIS International  
298 Sepsis Definitions Conference: *Critical Care Medicine*. 2003;31(4):1250-1256.  
299 doi:10.1097/01.CCM.0000050454.01978.3B
- 300 16. Angus DC, Van Der Poll T. Severe Sepsis and Septic Shock. *N Engl J Med*.  
301 2013;369(9):840-851. doi:10.1056/NEJMra1208623
- 302 17. Oostema JA, Chassee T, Baer W, Edberg A, Reeves MJ. Brief Educational Intervention  
303 Improves Emergency Medical Services Stroke Recognition. *Stroke*. 2019;50(5):1193-1200.  
304 doi:10.1161/STROKEAHA.118.023885
- 305 18. Price CI, Shaw L, Islam S, et al. Effect of an Enhanced Paramedic Acute Stroke Treatment  
306 Assessment on Thrombolysis Delivery During Emergency Stroke Care: A Cluster  
307 Randomized Clinical Trial. *JAMA Neurol*. 2020;77(7):840.  
308 doi:10.1001/jamaneurol.2020.0611

309

310



311 Table 1: EMS primary impressions of patients without stroke recognition

| <b>EMS Primary Impression, n (%)</b>  |              |
|---------------------------------------|--------------|
| Weakness                              | 2866 (25.87) |
| Altered Level of Consciousness        | 2755 (24.87) |
| Dizziness                             | 794 (7.17)   |
| Other Cardiovascular                  | 631 (5.70)   |
| Pain                                  | 405 (3.66)   |
| Headache                              | 357 (3.22)   |
| Syncope                               | 324 (2.92)   |
| Nausea/Vomiting                       | 315 (2.84)   |
| Other Injury                          | 254 (2.29)   |
| Malaise                               | 190 (1.72)   |
| Hyperglycemia                         | 183 (1.65)   |
| Respiratory Distress                  | 174 (1.57)   |
| Traumatic Brain Injury /Concussion    | 169 (1.53)   |
| No Complaints or Injury/Illness Noted | 166 (1.50)   |
| Behavioral/Psychiatric Episode        | 154 (1.39)   |
| Seizures                              | 135 (1.22)   |
| Visual Disturbance                    | 131 (1.18)   |
| Alcohol/Drug                          | 83 (0.75)    |
| Sepsis/Septic Shock                   | 70 (0.63)    |
| Urinary Tract Infection               | 59 (0.53)    |

312

313 EMS: Emergency Medical Services

314

315 Table 2. Patient Demographic Characteristics.  
316

|                                            | Overall       | EMS Impression |               | p-value* |
|--------------------------------------------|---------------|----------------|---------------|----------|
|                                            |               | Stroke         | Not Stroke    |          |
| N                                          | 34504         | 23427          | 11077         |          |
| Age, mean (SD)                             | 71.6 (14.3)   | 71.9 (14.2)    | 70.9 (14.5)   | <0.0001  |
| Female, n (%)                              | 17652 (51.3%) | 11938 (51.1%)  | 5714 (51.8%)  | 0.29     |
| Race, n (%)                                |               |                |               | <0.0001  |
| Asian, Native Hawaiian, or Pacific Isl.    | 645 (1.9%)    | 429 (1.8%)     | 216 (1.9%)    |          |
| Black or African American                  | 5823 (16.9%)  | 3789 (16.2%)   | 2034 (18.4%)  |          |
| White                                      | 22185 (64.3%) | 15211 (64.9%)  | 6974 (63.0%)  |          |
| Other, unknown, or American Native         | 5851 (17.0%)  | 3998 (17.1%)   | 1853 (16.7%)  |          |
| Hispanic ethnicity, n (%)                  | 2351 (8.1%)   | 1493 (7.6%)    | 858 (9.0%)    | <0.0001  |
| Social Vulnerability Index Quartile, N (%) |               |                |               | <0.0001  |
| Least Vulnerable                           | 8307 (24.1%)  | 5944 (25.4%)   | 2363 (21.4%)  |          |
| Quartile 2                                 | 9083 (26.4%)  | 6319 (27.0%)   | 2767 (25.0%)  |          |
| Quartile 3                                 | 8625 (25.0%)  | 5810 (24.8%)   | 2815 (25.4%)  |          |
| Most Vulnerable                            | 8452 (24.5%)  | 5333 (22.8%)   | 3119 (28.2%)  |          |
| Urbanicity, n (%)                          |               |                |               | 0.22     |
| Non-Metro Area                             | 1834 (5.3%)   | 1221 (5.2%)    | 613 (5.5%)    |          |
| Metro Area                                 | 32617 (94.7%) | 22168 (94.8%)  | 10449 (94.5%) |          |
| Census Region, n (%)                       |               |                |               | <0.0001  |
| Midwest                                    | 2052 (18.7%)  | 1380 (18.4%)   | 672 (19.4%)   |          |
| Northeast                                  | 716 (6.5%)    | 559 (7.4%)     | 157 (4.5%)    |          |
| South                                      | 5376 (49.0%)  | 3631 (48.3%)   | 1745 (50.4%)  |          |
| West                                       | 2827 (25.8%)  | 1941 (25.8%)   | 886 (25.6%)   |          |

317

318

319 \*p-values calculated using chi-square for categorical variables and t-test for means

320

321 Table 3. Patient Clinical Characteristics.  
322

|                          | EMS Impression        |                           | Risk of missed EMS stroke identification |                   |
|--------------------------|-----------------------|---------------------------|------------------------------------------|-------------------|
|                          | Stroke<br>(n = 23427) | Not Stroke<br>(n = 11077) | RR (95% CI)*                             | aRR (95% CI)**    |
| Alcohol and Drug Use     |                       |                           |                                          |                   |
| None indicated           | 23013 (98.2%)         | 10696 (96.6%)             | [ref]                                    | [ref]             |
| Indicated                | 414 (1.8%)            | 381 (3.4%)                | 1.51 (1.40, 1.63)                        | 1.48 (1.37, 1.59) |
| GCS                      |                       |                           |                                          |                   |
| 8 or less                | 1021 (4.5%)           | 658 (6.1%)                | 1.17 (1.10, 1.24)                        | 1.17 (1.10, 1.24) |
| 9 - 12                   | 3696 (16.4%)          | 1051 (9.8%)               | 0.66 (0.63, 0.70)                        | 0.67 (0.63, 0.70) |
| 13 - 15                  | 17905 (79.1%)         | 9018 (84.1%)              | [ref]                                    | [ref]             |
| Heart Rate               |                       |                           |                                          |                   |
| <60 (bradycardia)        | 1293 (5.5%)           | 590 (5.4%)                | 0.99 (0.92, 1.06)                        | 1.01 (0.94, 1.08) |
| 60-100 (normal)          | 17622 (75.5%)         | 8216 (74.5%)              | [ref]                                    | [ref]             |
| > 100 (tachycardia)      | 4418 (18.9%)          | 2215 (20.1%)              | 1.05 (1.01, 1.09)                        | 1.05 (1.01, 1.09) |
| Systolic Blood Pressure  |                       |                           |                                          |                   |
| <90 (hypotension)        | 228 (1.0%)            | 241 (2.2%)                | 1.48 (1.35, 1.63)                        | 1.47 (1.34, 1.61) |
| 90-140 (normal)          | 6841 (29.4%)          | 3621 (32.9%)              | [ref]                                    | [ref]             |
| >140 (hypertension)      | 16229 (69.7%)         | 72151 (64.9%)             | 0.88 (0.86, 0.91)                        | 0.87 (0.84, 0.90) |
| Diastolic Blood Pressure |                       |                           |                                          |                   |
| <60 (hypotension)        | 1120 (4.9%)           | 750 (6.9%)                | 1.21 (1.14, 1.28)                        | 1.22 (1.15, 1.30) |
| 60-90 (normal)           | 12495 (54.3%)         | 6189 (56.9%)              | [ref]                                    | [ref]             |
| >90 (hypertension)       | 9408 (40.9%)          | 3931 (36.2%)              | 0.89 (0.86, 0.92)                        | 0.87 (0.84, 0.90) |
| Respiratory Rate         |                       |                           |                                          |                   |
| <8                       | 58 (0.3%)             | 56 (0.5%)                 | 1.54 (1.27, 1.85)                        | 1.44 (1.19, 1.74) |
| 8-20                     | 20223 (88.8%)         | 9502 (88.1%)              | [ref]                                    | [ref]             |
| >20                      | 2492 (10.9%)          | 1233 (11.4%)              | 1.04 (0.99, 1.09)                        | 1.05 (1.00, 1.10) |
| Oxygen Saturation        |                       |                           |                                          |                   |
| < 89                     | 933 (4.1%)            | 476 (4.5%)                | 1.05 (0.98, 1.13)                        | 1.09 (1.01, 1.18) |
| 89 +                     | 21561 (95.9%)         | 10215 (95.5%)             | [ref]                                    | [ref]             |
| Fever                    |                       |                           |                                          |                   |
| <95                      | 51 (0.6%)             | 38 (0.7%)                 | 1.17 (0.92, 1.49)                        | 1.24 (0.98, 1.56) |
| 95-100.4                 | 9043 (98.3%)          | 5197 (96.7%)              | [ref]                                    | [ref]             |
| >100.4                   | 106 (1.2%)            | 138 (2.6%)                | 1.55 (1.39, 1.73)                        | 1.54 (1.37, 1.72) |

323  
324  
325 \*Unadjusted generalized linear models (GLMs) were run for each clinical characteristic as the  
326 single clinical exposure

327 \*\*Adjusted GLMs were calculated to include the single exposure along with covariates of  
328 patient age, sex, race, GCS, and urbanicity.

329 ED: Emergency Department, EMS: Emergency Medical Services, GCS: Glasgow Coma Score,

330 GLM: Generalized Linear Model, RR: Relative Risk, aRR: adjusted Relative Risk.

331
